# Supplementary material for: SnO2@Si core–shell nanowire arrays on carbon cloth as a flexible anode for Li ion batteries
Source: Royal Society of Chemistry journal article supplement (doi:10.1039/c3ta11943b), 2013-01-01
Supplement: c3ta11943b.pdf [file c3ta11943b.pdf]

## Supporting information

### **SnO<sub>2</sub>@Si core-shell nanowire arrays on carbon cloth as flexible anode for Li ion batteries**

Weina Ren<sup>1</sup>, Chong Wang<sup>2</sup>, Linfeng Lu<sup>3</sup>, Dongdong Li<sup>3</sup>, Chuanwei Cheng<sup>1</sup>, Jinping Liu<sup>2</sup>

<sup>1</sup>Shanghai Key Laboratory of Special Artificial Microstructure Materials and Technology & School of Physics Science and Engineering, Tongji University, Shanghai 200092, P. R. China

E-mail: cwcheng@tongji.edu.cn

<sup>2</sup>Institute of Nanoscience and Nanotechnology, Department of Physics, Central China Normal University, Wuhan 430079, P. R. China.

E-mail: liujp@phy.ccnu.edu.cn

<sup>3</sup>Shanghai Advanced Research Institute, Chinese Academy of Sciences, Shanghai, 201210, P. R. China.

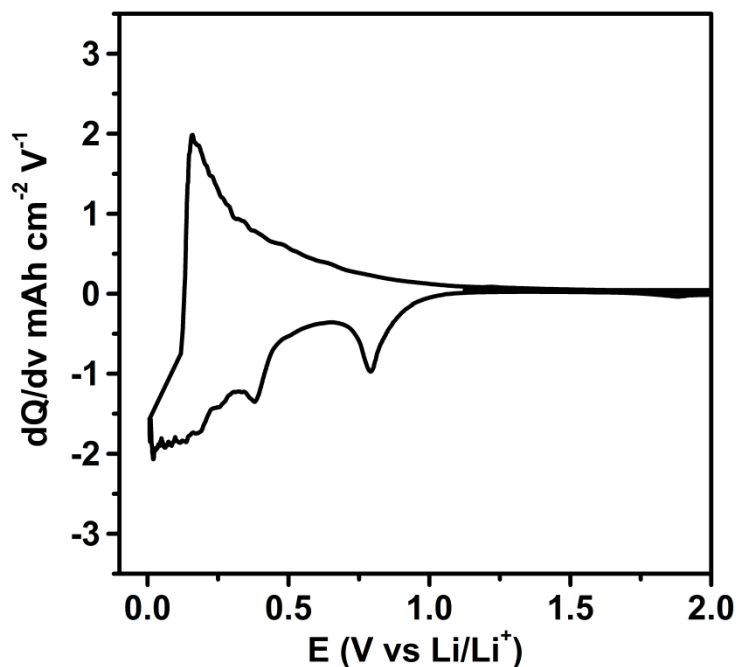

S1 The 1st-cycle differential capacity curve of 3D SnO<sub>2</sub>@Si nanowires electrode

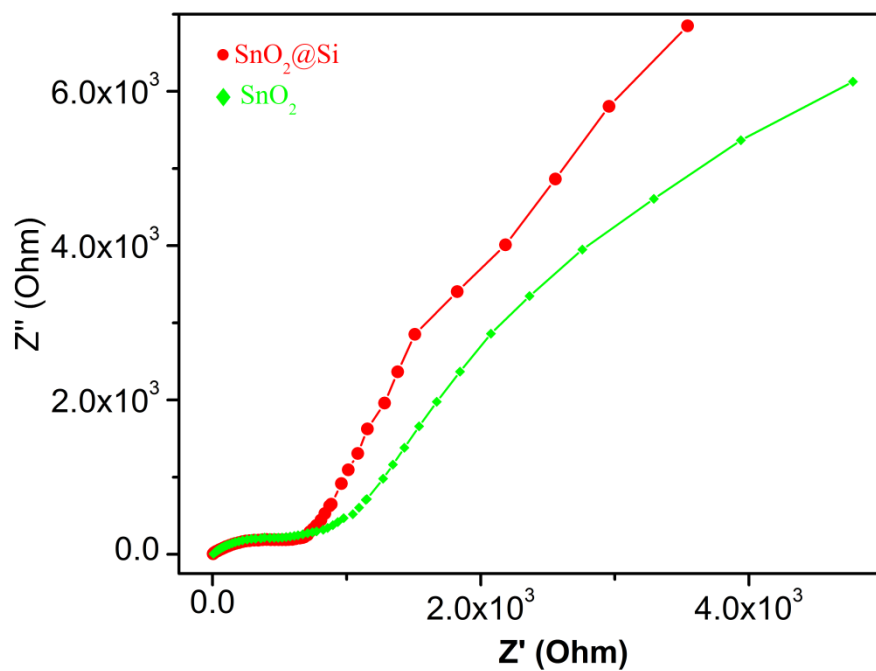

S2 Nyquist plots of the cells containing the  $\text{SnO}_2$  nanowires and  $\text{SnO}_2@Si$  nanowires electrodes.
